# Supplementary material for: High-dose ascorbic acid synergizes with anti-PD1 therapy in non-small cell lung cancer in vitro and in vivo models
Source: Front Immunol. 2025 Jan 17;15:1512605. doi: 10.3389/fimmu.2024.1512605 (PMC11783322; doi:10.3389/fimmu.2024.1512605)
Supplement: Supplementary file 3 [file Table2.xlsx]

## Sheet: down 90 protein
Supplementary table 2. List of 90 proteins whose immune system-related protein expression was reduced by combination between anti-PD1 and high-dose AA compared with control.
Accession No.	Gene name	Description	ANOVA q-value
Q9CWF2	Tubb2b	Tubulin beta-2B chain	0
Q8BJW6	Eif2a	Eukaryotic translation initiation factor 2A	0
P32233	Drg1	Developmentally-regulated GTP-binding protein 1	0
Q61140	Bcar1	Breast cancer anti-estrogen resistance protein 1	0
P32883	Kras	GTPase KRas	0
Q8BSK8	Rps6kb1	Ribosomal protein S6 kinase beta-1	0
Q3TGF2	Fam107b	Protein FAM107B	0
P70671	Irf3	Interferon regulatory factor 3	4.81928e-05
P01899	H2-D1	H-2 class I histocompatibility antigen, D-B alpha chain	5.45455e-05
Q8BG51	Rhot1	Mitochondrial Rho GTPase 1	5.74163e-05
Q8VE11	Mtmr6	Myotubularin-related protein 6	6.45161e-05
Q64378	Fkbp5	Peptidyl-prolyl cis-trans isomerase FKBP5	6.47773e-05
Q99L90	Mcrs1	Microspherule protein 1	6.50407e-05
Q62241	Snrpc	U1 small nuclear ribonucleoprotein C	6.55738e-05
Q9Z2B9	Rps6ka4	Ribosomal protein S6 kinase alpha-4	6.66667e-05
Q6PDM2	Srsf1	Serine/arginine-rich splicing factor 1	6.95652e-05
P52482	Ube2e1	Ubiquitin-conjugating enzyme E2 E1	7.05882e-05
Q6NSR8	Npepl1	Probable aminopeptidase NPEPL1	7.7135e-05
A2AQ07	Tubb1	Tubulin beta-1 chain	7.79944e-05
P55284	Cdh5	Cadherin-5	7.84314e-05
Q61550	Rad21	Double-strand-break repair protein rad21 homolog	0.000102564
Q9CVD2	Atxn3	Ataxin-3	0.000103627
P31750	Akt1	RAC-alpha serine/threonine-protein kinase	0.00018648
Q922X9	Prmt7	Protein arginine N-methyltransferase 7	0.000189616
Q9WU40	Lemd3	Inner nuclear membrane protein Man1	0.000236287
Q9R1C7	Prpf40a	Pre-mRNA-processing factor 40 homolog A	0.000258586
P46460	Nsf	Vesicle-fusing ATPase	0.000291188
Q63844	Mapk3	Mitogen-activated protein kinase 3	0.00030713
Q71FD7	Fblim1	Filamin-binding LIM protein 1	0.000383471
Q9Z0F8	Adam17	Disintegrin and metalloproteinase domain-containing protein 17	0.0004032
P63280	Ube2i	SUMO-conjugating enzyme UBC9	0.000444444
P97360	Etv6	Transcription factor ETV6	0.000505814
Q7TT18	Atf7ip	Activating transcription factor 7-interacting protein 1	0.000535966
P62754	Rps6	40S ribosomal protein S6	0.000569848
O35691	Pnn	Pinin	0.000572215
Q9JHI7	Exosc9	Exosome complex component RRP45	0.000591781
Q9QZ08	Nagk	N-acetyl-D-glucosamine kinase	0.000612081
Q8BK63	Csnk1a1	Casein kinase I isoform alpha	0.000615797
Q6PFQ7	Rasa4	Ras GTPase-activating protein 4	0.00063268
Q3TIU4	Pde12	2',5'-phosphodiesterase 12	0.000673418
P22366	Myd88	Myeloid differentiation primary response protein MyD88	0.000711656
Q9QYJ3	Dnajb1	DnaJ homolog subfamily B member 1	0.000716049
P51569	Gla	Alpha-galactosidase A	0.000716934
P47811	Mapk14	Mitogen-activated protein kinase 14	0.000772834
Q8CAS9	Parp9	Protein mono-ADP-ribosyltransferase PARP9	0.000865741
Q60973	Rbbp7	Histone-binding protein RBBP7	0.000867749
Q9Z0R6	Itsn2	Intersectin-2	0.000879171
A2AR02	Ppig	Peptidyl-prolyl cis-trans isomerase G	0.000912994
Q8BT07	Cep55	Centrosomal protein of 55 kDa	0.000944882
Q6A068	Cdc5l	Cell division cycle 5-like protein	0.000990011
Q8BRN9	Cc2d1b	Coiled-coil and C2 domain-containing protein 1B	0.00100549
Q9QYA2	Tomm40	Mitochondrial import receptor subunit TOM40 homolog	0.00107286
Q8R5A3	Apbb1ip	Amyloid beta A4 precursor protein-binding family B member 1-interacting protein	0.00112281
Q9D711	Pir	Pirin	0.00116854
Q80XI3	Eif4g3	Eukaryotic translation initiation factor 4 gamma 3	0.00124012
Q9CRC9	Gnpda2	Glucosamine-6-phosphate isomerase 2	0.00147502
P70353	Nfyc	Nuclear transcription factor Y subunit gamma	0.00178811
P70295	Aup1	Lipid droplet-regulating VLDL assembly factor AUP1	0.00208117
O54941	Smarce1	SWI/SNF-related matrix-associated actin-dependent regulator of chromatin subfamily E member 1	0.00217577
P17742	Ppia	Peptidyl-prolyl cis-trans isomerase A	0.00256493
P04184	Tk1	Thymidine kinase, cytosolic	0.00292926
Q9QZI9	Serinc3	Serine incorporator 3	0.00341813
Q62018	Ctr9	RNA polymerase-associated protein CTR9 homolog	0.00341927
Q6ZWQ7	Spcs3	Signalptidase complex subunit 3	0.00378683
Q8BU31	Rap2c	Ras-related protein Rap-2c	0.00500056
D3YXK2	Safb	Scaffold attachment factor B1	0.00506013
Q922H4	Gmppa	Mannose-1-phosphate guanyltransferase alpha	0.00532821
P15806	Tcf3	Transcription factor E2-alpha	0.00534795
O88811	Stam2	Signal transducing adapter molecule 2	0.00840357
P70372	Elavl1	ELAV-like protein 1	0.00884693
O35682	Myadm	Myeloid-associated differentiation marker	0.00968046
P06797	Ctsl	Procathepsin L	0.0103413
Q08642	Padi2	Protein-arginine deiminase type-2	0.0112529
Q9JJX6	P2rx4	P2X purinoceptor 4	0.0115359
Q9JKK8	Atr	Serine/threonine-protein kinase ATR	0.0115503
P23708	Nfya	Nuclear transcription factor Y subunit alpha	0.0120362
Q8BSP2	Ncaph2	Condensin-2 complex subunit H2	0.0124285
Q7TSS2	Ube2q1	Ubiquitin-conjugating enzyme E2 Q1	0.0139836
P49222	Epb42	Protein 4.2	0.0147499
Q8K124	Plekho2	Pleckstrin homology domain-containing family O member 2	0.0162441
Q9D6N5	Drap1	Dr1-associated corepressor	0.0163878
P35550	Fbl	rRNA 2'-O-methyltransferase fibrillarin	0.0170871
Q08639	Tfdp1	Transcription factor Dp-1	0.0183963
Q9D0I4	Stx17	Syntaxin-17	0.0192268
P63001	Rac1	Ras-related C3 botulinum toxin substrate 1	0.0216241
Q9EPK7	Xpo7	Exportin-7	0.0331875
Q9WTS2	Fut8	Alpha-(1,6)-fucosyltransferase	0.03552
Q03958	Pfdn6	Prefoldin subunit 6	0.0356473
Q640M1	Utp14a	U3 small nucleolar RNA-associated protein 14 homolog A	0.0426614
P35821	Ptpn1	Tyrosine-protein phosphatase non-receptor type 1	0.0489381
